# Supplementary material
Source: publisher figshare collection journal article supplement (https://frontiersin.figshare.com/ndownloader/files/37729878)
Supplement: Supplementary file 1 [file 37729878]

## Sheet: Sheet1
Landsat 8 (OLI) Satellite Imagery (courtesy of the U.S. Geological Survey, available on earthexplorer.usgs.gov) used to create 34 mean monthly ice velocity maps for the melt seasons 2014-2020 with the Glacier Image Velocimetry (GIV) toolbox (Van Wyk De Vries & Wickert, 2021)(cf. Sect. 3.7)
2014	LC08_L1TP_030247_20140604_20200911_02_T1_B8
	LC08_L1TP_033247_20140609_20200911_02_T1_B8
	LC08_L1TP_036246_20140614_20200911_02_T1_B8
	LC08_L1TP_030247_20140620_20200911_02_T1_B8
	LC08_L1TP_036246_20140630_20200911_02_T1_B8
	LC08_L1TP_030247_20140706_20200911_02_T1_B8
	LC08_L1TP_045245_20140715_20200911_02_T1_B8
	LC08_L1TP_030247_20140722_20200911_02_T1_B8
	LC08_L1TP_036246_20140801_20200911_02_T1_B8
	LC08_L1TP_026248_20140811_20200911_02_T1_B8
	LC08_L1TP_038246_20140815_20200911_02_T1_B8
	LC08_L1TP_034247_20140819_20200911_02_T1_B8
	LC08_L1TP_026248_20140827_20200911_02_T1_B8
	LC08_L1TP_038246_20140831_20200911_02_T1_B8
	LC08_L1TP_023248_20140907_20200911_02_T1_B8
	LC08_L1TP_036246_20140918_20200910_02_T1_B8
2015	LC08_L2SP_027248_20150501_20200909_02_T1_SR_B4
	LC08_L2SP_026248_20150510_20201015_02_T1_SR_B5
	LC08_L2SP_032247_20150520_20200909_02_T1_SR_B4
	LC08_L2SP_031247_20150529_20200909_02_T1_SR_B4
	LC08_L1TP_027248_20150602_20170226_01_T1_B8
	LC08_L1TP_026248_20150611_20170226_01_T1_B8
	LC08_L1TP_024248_20150629_20170226_01_T1_B8
	LC08_L1TP_027248_20150704_20170226_01_T1_B8
	LC08_L1TP_024248_20150715_20170226_01_T1_B8
	LC08_L1TP_024248_20150731_20170226_01_T1_B8
	LC08_L1TP_028248_20150812_20201015_02_T1_B8
	LC08_L1TP_027248_20150821_20170225_01_T1_B8
	LC08_L1TP_028248_20150828_20170225_01_T1_B8
	LC08_L1TP_031247_20150902_20200908_02_T1_B8
	LC08_L1TP_037001_20150912_20200908_02_T1_B8
2016	LC08_L1TP_025248_20160505_20170223_01_T1_B8
	LC08_L1TP_045245_20160517_20200907_02_T1_B8
	LC08_L1TP_033247_20160529_20200906_02_T1_B8
	LC08_L1TP_027248_20160604_20170223_01_T1_B8
	LC08_L1TP_026248_20160629_20170222_01_T1_B8
	LC08_L1TP_037246_20160712_20200906_02_T1_B8
	LC08_L1TP_024248_20160717_20170222_01_T1_B8
	LC08_L1TP_027248_20160722_20170221_01_T1_B8
	LC08_L1TP_025248_20160724_20170222_01_T1_B8
	LC08_L1TP_026248_20160731_20180201_01_T1_B8
	LC08_L1TP_026248_20160816_20170223_01_T1_B8
	LC08_L1TP_032247_20160826_20200906_02_T1_B8
	LC08_L1TP_024248_20160903_20170222_01_T1_B8
	LC08_L1TP_025248_20160910_20170222_01_T1_B8
2017	LC08_L1TP_029247_20170504_20201015_02_T1_B8
	LC08_L1TP_031247_20170518_20200904_02_T1_B8
	LC08_L1TP_026248_20170531_20170615_01_T1_B8
	LC08_L1TP_032247_20170610_20200903_02_T1_B8
	LC08_L1TP_026248_20170616_20200903_02_T1_B8
	LC08_L1TP_028248_20170630_20170715_01_T1_B8
	LC08_L1TP_037246_20170715_20200903_02_T1_B8
	LC08_L1TP_052244_20170724_20200903_02_T1_B8
	LC08_L1TP_046245_20170730_20200903_02_T1_B8
	LC08_L1TP_031247_20170806_20201015_02_T1_B8
	LC08_L1TP_033247_20170820_20200903_02_T1_B8
	LC08_L1TP_023248_20170830_20200903_02_T1_B8
	LC08_L1TP_026248_20170904_20170916_01_T1_B8
	LC08_L1TP_022248_20170908_20170927_01_T1_B8
	LC08_L1TP_024248_20170922_20171012_01_T1_B8
2018	LC08_L1TP_027248_20180509_20180517_01_T1_B8
	LC08_L1TP_025248_20180511_20180517_01_T1_B8
	LC08_L1TP_026248_20180518_20180604_01_T1_B8
	LC08_L1TP_024248_20180605_20180615_01_T1_B8
	LC08_L1TP_024248_20180621_20180703_01_T1_B8
	LC08_L1TP_025248_20180628_20180704_01_T1_B8
	LC08_L1TP_024248_20180707_20180717_01_T1_B8
	LC08_L1TP_037246_20180718_20200831_02_T1_B8
	LC08_L1TP_024248_20180723_20180731_01_T1_B8
	LC08_L1TP_026248_20180806_20180815_01_T1_B8
	LC08_L1TP_044245_20180820_20200831_02_T1_B8
	LC08_L1TP_050244_20180830_20200831_02_T1_B8
	LC08_L1TP_029247_20180912_20200830_02_T1_B8
	LC08_L1TP_025248_20180916_20180928_01_T1_B8
	LC08_L1TP_032247_20180917_20200830_02_T1_B8
2019	LC08_L1TP_037246_20190502_20200829_02_T1_B8
	LC08_L1TP_024248_20190507_20190521_01_T1_B8
	LC08_L1TP_026248_20190521_20190604_01_T1_B8
	LC08_L1TP_027248_20190528_20190605_01_T1_B8
	LC08_L1TP_037246_20190603_20200828_02_T1_B8
	LC08_L1TP_024248_20190608_20190619_01_T1_B8
	LC08_L1TP_022248_20190610_20190619_01_T1_B8
	LC08_L1TP_025248_20190701_20190706_01_T1_B8
	LC08_L1TP_022248_20190728_20190801_01_T1_B8
	LC08_L1TP_039246_20190804_20200827_02_T1_B8
	LC08_L1TP_029247_20190814_20200827_02_T1_B8
	LC08_L1TP_033247_20190826_20200826_02_T1_B8
	LC08_L1TP_025248_20190903_20190917_01_T1_B8
	LC08_L1TP_027248_20190917_20190926_01_T1_B8
	LC08_L1TP_025248_20190919_20190926_01_T1_B8
2020	LC08_L1TP_024248_20200509_20200526_01_T1_B8
	LC08_L1TP_022248_20200511_20200526_01_T1_B8
	LC08_L1TP_027248_20200514_20200527_01_T1_B8
	LC08_L1TP_025248_20200617_20200626_01_T1_B8
	LC08_L1TP_026248_20200624_20200707_01_T1_B8
	LC08_L1TP_022248_20200628_20200708_01_T1_B8
	LC08_L1TP_026248_20200710_20200721_01_T1_B8
	LC08_L1TP_022248_20200714_20200722_01_T1_B8
	LC08_L1TP_027248_20200717_20200722_01_T1_B8
	LC08_L1TP_026248_20200726_20200807_01_T1_B8
	LC08_L1TP_022248_20200730_20200807_01_T1_B8
	LC08_L1TP_022248_20200815_20200822_01_T1_B8
	LC08_L1TP_024248_20200829_20200905_01_T1_B8
	LC08_L1TP_026248_20200912_20200920_01_T1_B8
	LC08_L1TP_022248_20200916_20201006_01_T1_B8
